# Supplementary figures and images for: Cupriavidus metallidurans Strains with Different Mobilomes and from Distinct Environments Have Comparable Phenomes
Source: MDPI journal article supplement (doi:10.3390/genes9100507), 2018-10-18

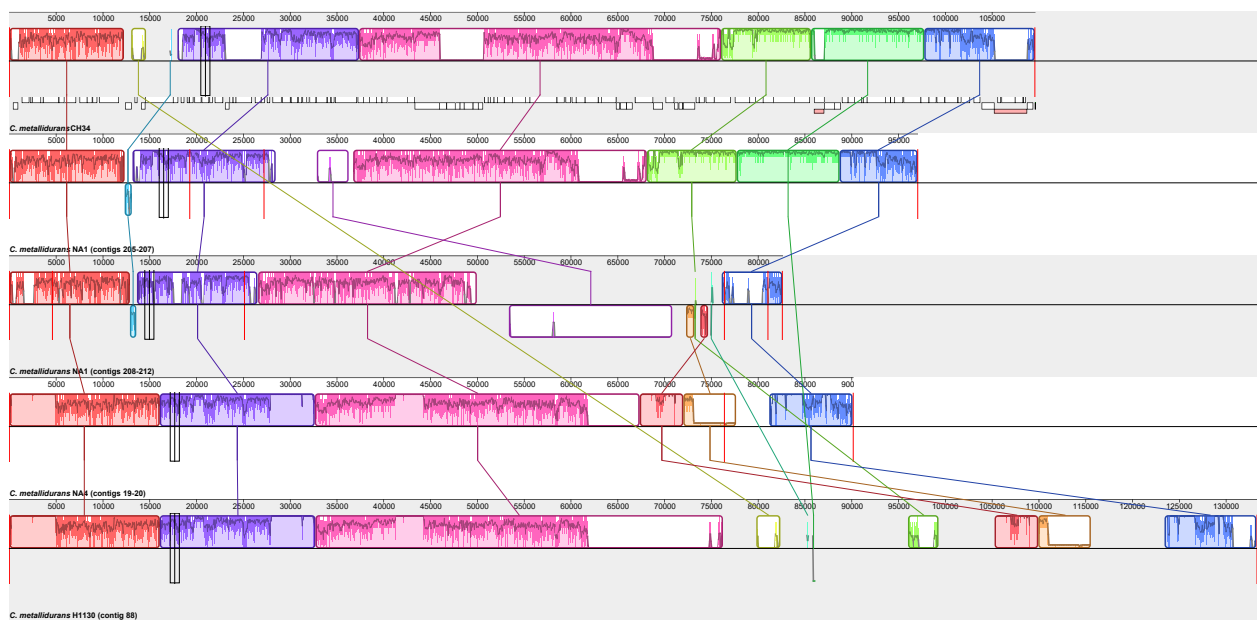

Supplement: s1 [file s1]
